# Supplementary material
Source: publisher figshare collection journal article supplement (https://acs.figshare.com/ndownloader/files/5167945)
Supplement: Supplementary file 1 [file 5167945]

## **Supporting Information Cover Sheet**

Manuscript #es0495011

Manuscript Title: PBDEs, PBBs, and PCNs in Three Communities of Free-Ranging Killer Whales (*Orcinus orca*) from the Northeastern Pacific Ocean

Number of Supporting Information Pages: 3

Number of Supporting Information Figures: 0

Number of Supporting Information Tables: 3
